# Supplementary material for: Partnering With Patients, Caregivers, and Clinicians to Determine Research Priorities for Concussion
Source: PubMed Central journal article supplement (PMC10248744; doi:10.1001/jamanetworkopen.2023.16383), 2023-06-07
Supplement: jamanetwopen-e2316383-s002.pdf [file jamanetwopen-e2316383-s002.pdf]

\*First name, last name, and suffix (if applicable) are required and will appear in PubMed.

| <b>*Group Name(s): Canadian Traumatic Brain Injury Research Consortium (CTRC)</b> |                   |                              |                         |                                                                  |                                                 |                                                                |                                                                                                   |
|-----------------------------------------------------------------------------------|-------------------|------------------------------|-------------------------|------------------------------------------------------------------|-------------------------------------------------|----------------------------------------------------------------|---------------------------------------------------------------------------------------------------|
| <b>*First Name and Middle Initial(s)</b>                                          | <b>*Last Name</b> | <b>*Suffix (eg, Jr, III)</b> | <b>Academic Degrees</b> | <b>Institution</b>                                               | <b>Location (city, state/province, country)</b> | <b>Role or Contribution, eg, chair, principal investigator</b> | <b>Group (if more than 1 Group listed in the byline) and/or Subgroup (eg, Steering Committee)</b> |
| Mark                                                                              | Bayley            |                              | MD                      | Toronto Rehabilitation Institute and University of Toronto       | Toronto, ON, Canada                             | Co-Investigator                                                | Canadian Traumatic Brain Injury Consortium (CTRC)                                                 |
| Phil                                                                              | Fait              |                              | PhD                     | Université du Québec à Trois-Rivières                            | Trois-Rivières, QC, Canada                      | Co-Investigator                                                | Canadian Traumatic Brain Injury Consortium (CTRC)                                                 |
| Isabelle                                                                          | Gagnon            |                              | PhD                     | Montreal Children's Hospital and McGill University Health Center | Montreal, QC, Canada                            | Co-Investigator                                                | Canadian Traumatic Brain Injury Consortium (CTRC)                                                 |
| Noah D                                                                            | Silverberg        |                              | PhD                     | University of British Columbia, and GF Strong Rehab Centre       | Vancouver, BC, Canada                           | Co-Investigator                                                | Canadian Traumatic Brain Injury Consortium (CTRC)                                                 |
