# Supplementary material for: Partnering With Patients, Caregivers, and Clinicians to Determine Research Priorities for Concussion
Source: PubMed Central journal article supplement (PMC10248744; doi:10.1001/jamanetworkopen.2023.16383), 2023-06-07
Supplement: jamanetwopen-e2316383-s003.pdf [file jamanetwopen-e2316383-s003.pdf]

## Data Sharing Statement

Osmond. Partnering With Patients, Caregivers, and Clinicians to Determine Research Priorities for Concussion. *JAMA Netw Open*. Published June 07, 2023.

doi:10.1001/jamanetworkopen.2023.16383

### Data

**Data available:** Yes

**Data types:** Deidentified participant data

**How to access data:** [osmond@cheo.on.ca](mailto:osmond@cheo.on.ca), <https://www.jla.nihr.ac.uk/priority-setting-partnerships/concussion-canada/> (to be uploaded after publication)

**When available:** With publication

### Supporting Documents

**Document types:** None

### Additional Information

**Who can access the data:** The data will be available to anyone requesting the data

**Types of analyses:** For any purpose

**Mechanisms of data availability:** Without investigator support
